# Supplementary material for: A low-cost and green-solvent-processable hole-transport material enabled by a traditional bidentate ligand for highly efficient inverted perovskite solar cells
Source: Royal Society of Chemistry journal article supplement (doi:10.1039/d1tc02053f), 2021-01-01
Supplement: d1tc02053f1.pdf [file d1tc02053f1.pdf]

# **A low-cost and green-solvent-processable hole-transport material enabled by a traditional bidentate ligand for highly efficient inverted perovskite solar cells**

Jiachen Huang,<sup>‡a,d</sup> Jie Yang,<sup>‡a</sup> Dan Li,<sup>c</sup> Huiliang Sun,<sup>\*a,b</sup> Mengyao Su,<sup>a</sup> Xiaofei Ji,<sup>a</sup>  
Bolin Li,<sup>a</sup> Bangbang Li,<sup>a</sup> Qiaogan Liao,<sup>a,e</sup> Dongxue Han,<sup>b</sup> He Yan,<sup>d</sup> Li Niu,<sup>\*b</sup> Dong  
Wang,<sup>\*c</sup> and Xugang Guo<sup>\*a</sup>

<sup>a</sup> *Department of Materials Science and Engineering, Southern University of Science and Technology (SUSTech), No. 1088, Xueyuan Road, Shenzhen, Guangdong 518055, China*

<sup>b</sup> *Center for Advanced Analytical Science, School of Chemistry and Chemical Engineering, Guangzhou University, Guangzhou 510006, China.*

<sup>c</sup> *Center for AIE Research, College of Materials Science and Engineering, Shenzhen University, Shenzhen 518060, China*

<sup>d</sup> *Department of Chemistry, The Hong Kong University of Science and Technology, Clear Water Bay, Hong Kong*

<sup>e</sup> *School of Materials Science and Engineering, Harbin Institute of Technology, Harbin 150001, China*

<sup>‡</sup> J. H. and J. Y. contributed equally to this work.

<sup>\*</sup>Corresponding author.

*E-mail address:* sunhl@sustech.edu.cn (H. Sun); lniu@gzhu.edu.cn (L. Niu)  
wangd@szu.edu.cn (D. Wang); guoxg@sustech.edu.cn (X. Guo)

## Experimental Section

Scheme S1 Overall synthetic route of M0 and M1

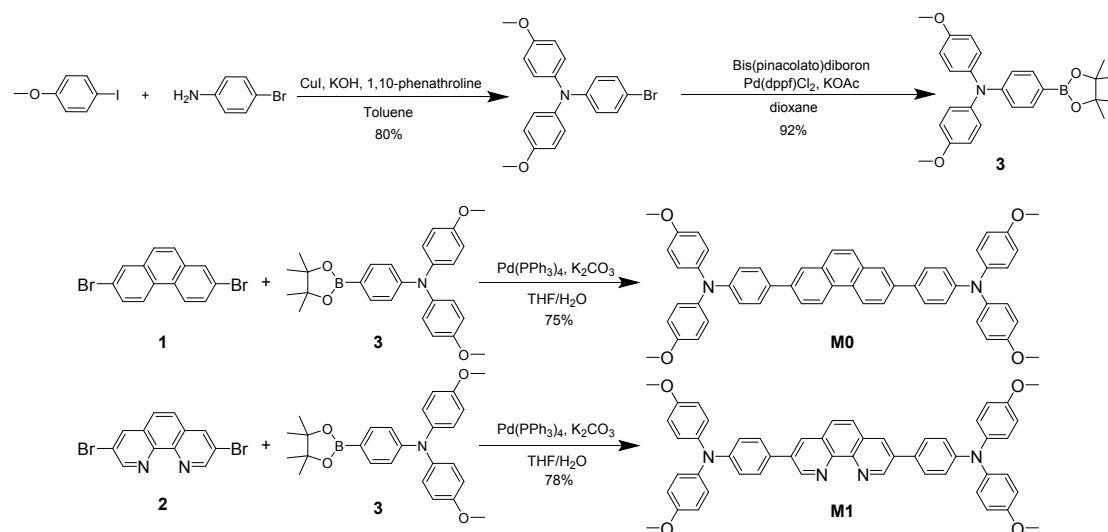

**M0.** <sup>1</sup>H NMR (400 MHz, Chloroform-*d*) δ 8.69 (d, *J* = 8.7 Hz, 2H), 8.03 (d, *J* = 1.8 Hz, 2H), 7.87 (dd, *J* = 8.6, 1.9 Hz, 2H), 7.77 (s, 2H), 7.60 (d, *J* = 8.7 Hz, 4H), 7.12 (d, *J* = 8.8 Hz, 4H), 7.05 (d, *J* = 8.6 Hz, 8H), 6.86 (d, *J* = 9.0 Hz, 8H), 3.82 (s, 12H; CH<sub>3</sub>). <sup>13</sup>C NMR (101 MHz, Chloroform-*d*) δ 155.94, 140.89, 138.70, 132.36, 128.85, 127.72, 127.46, 126.68, 125.62, 125.47, 123.15, 120.85, 114.76, 55.54. HRMS: C<sub>52</sub>H<sub>44</sub>N<sub>2</sub>O<sub>4</sub> calcd: 784.3296, found: 783.3294.

**M1.** <sup>1</sup>H NMR (400 MHz, Chloroform-*d*) δ 9.40 (d, *J* = 2.3 Hz, 2H), 8.31 (d, *J* = 2.3 Hz, 2H), 7.83 (s, 2H), 7.61 (d, *J* = 8.7 Hz, 4H), 7.13 (d, *J* = 8.9 Hz, 8H), 7.07 (d, *J* = 8.7 Hz, 4H), 6.88 (d, *J* = 9.0 Hz, 8H), 3.82 (s, 12H; CH<sub>3</sub>). <sup>13</sup>C NMR (101 MHz, Chloroform-*d*) δ 156.01, 148.96, 140.28, 135.00, 131.82, 128.66, 128.20, 127.73, 126.75, 126.71, 120.24, 114.62, 55.32. HRMS: C<sub>52</sub>H<sub>42</sub>N<sub>4</sub>O<sub>4</sub> calcd: 786.3206, found: 786.3203.

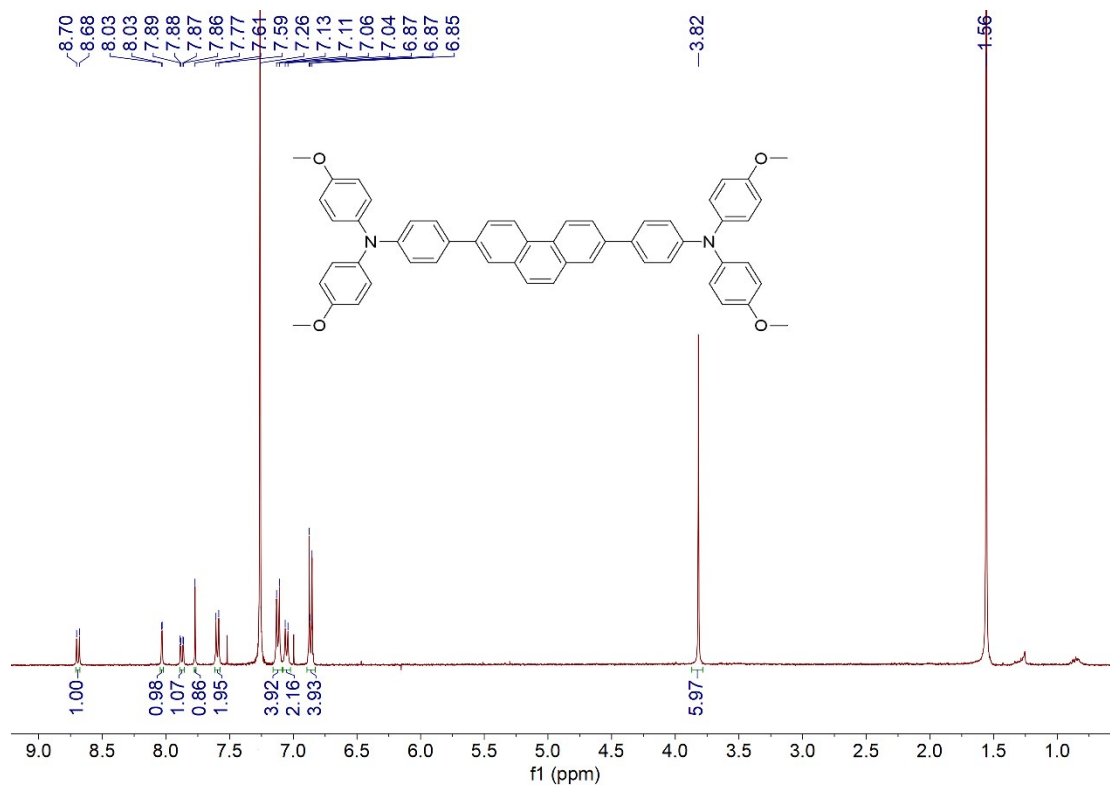

Fig. S1  $^1\text{H}$  NMR spectrum of M0.

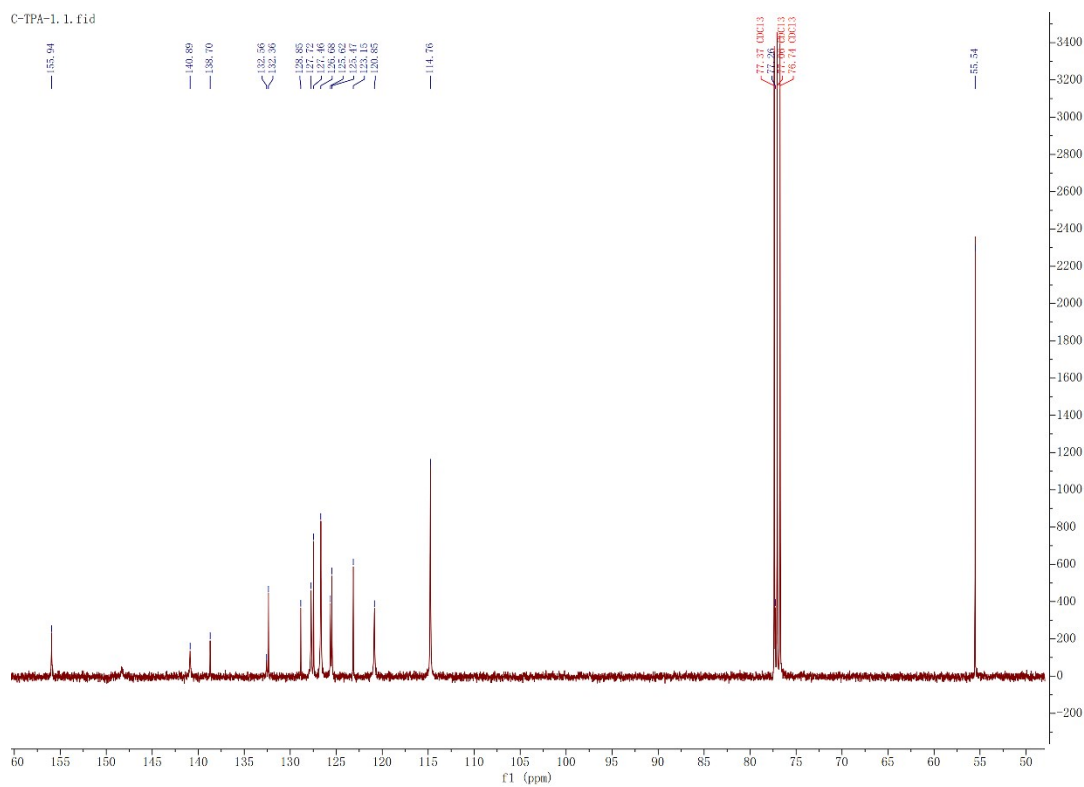

Fig. S2  $^{13}\text{C}$  NMR spectrum of M0.

Positive mode

1 #14 RT: 0.10 AV: 1 NL: 1.49E7  
T: FTMS + p ESI Full ms [200.0000-1000.0000]

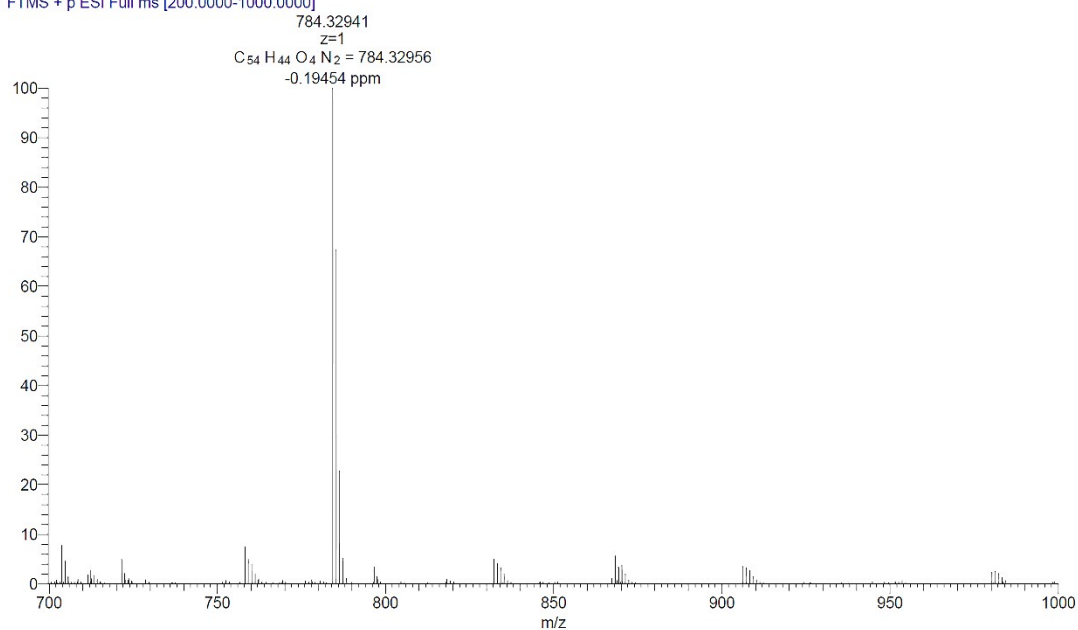

Fig. S3 HRMS of M0.

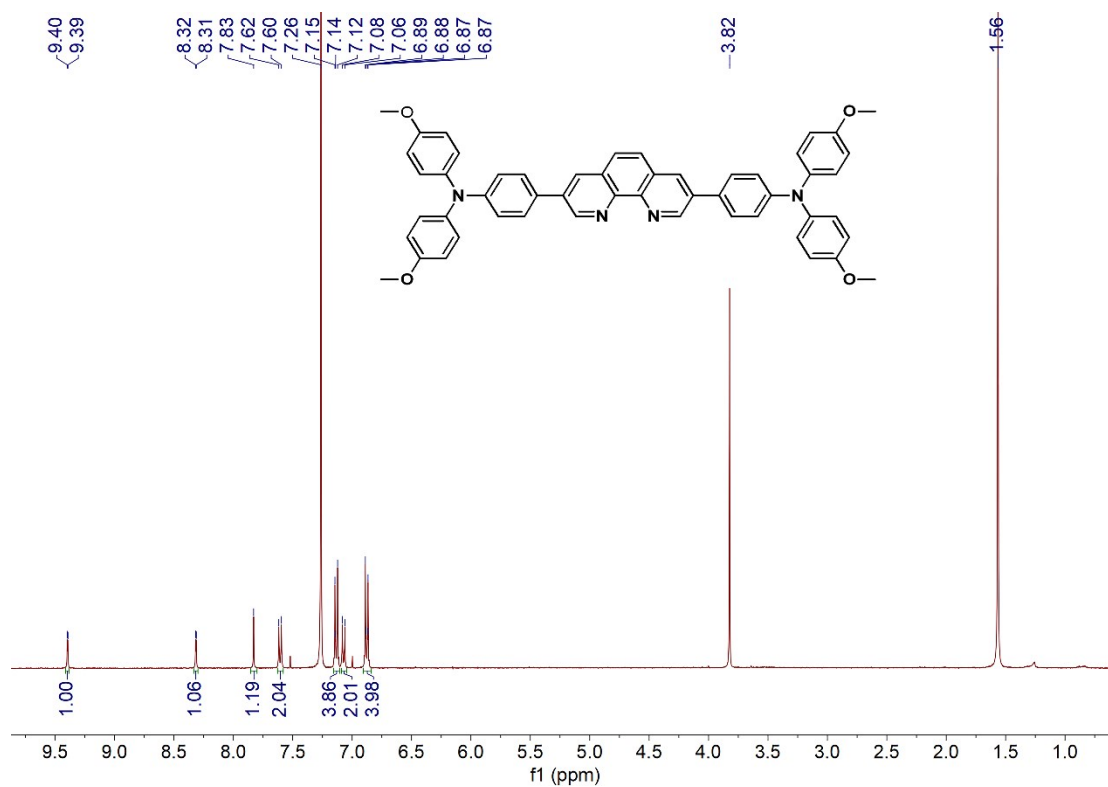

Fig. S4 <sup>1</sup>H NMR spectrum of M1.

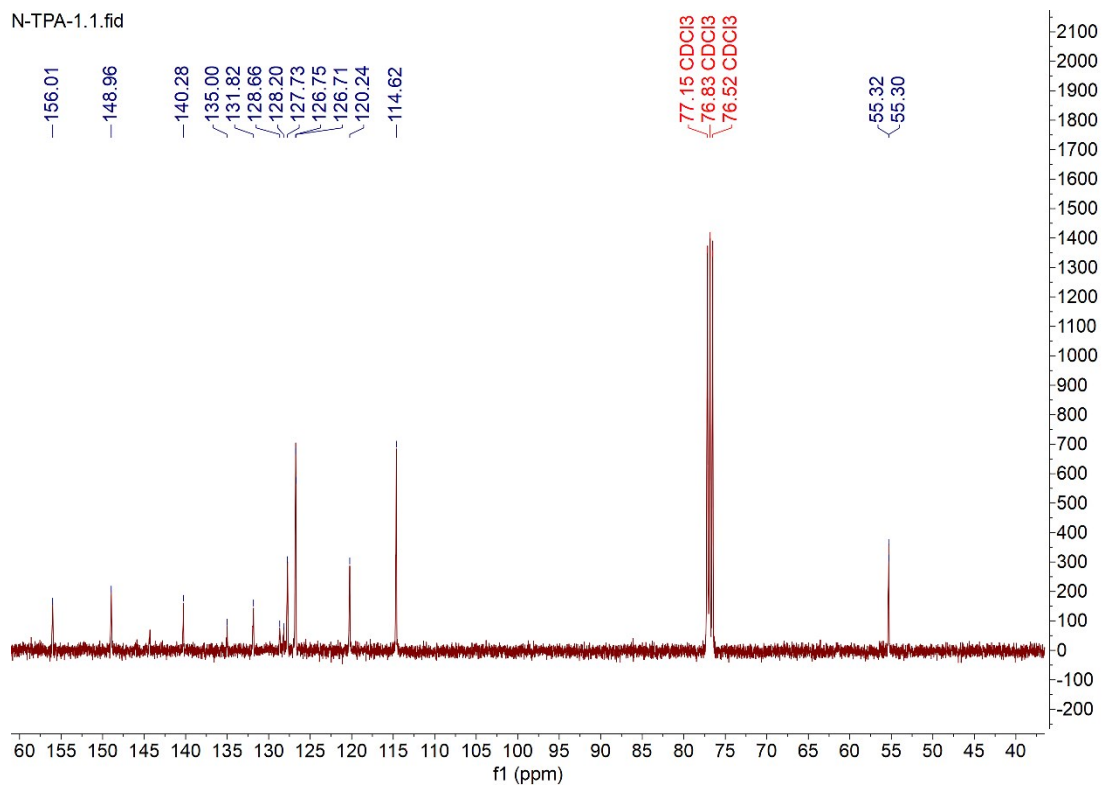

**Fig. S5**  $^{13}\text{C}$  NMR spectrum of **M1**.

Positive mode  $[\text{M}+\text{H}]^+$   
 2 #16 RT: 0.11 AV: 1 NL: 1.35E8  
 T: FTMS + p ESI Full ms [200.0000-1000.0000]

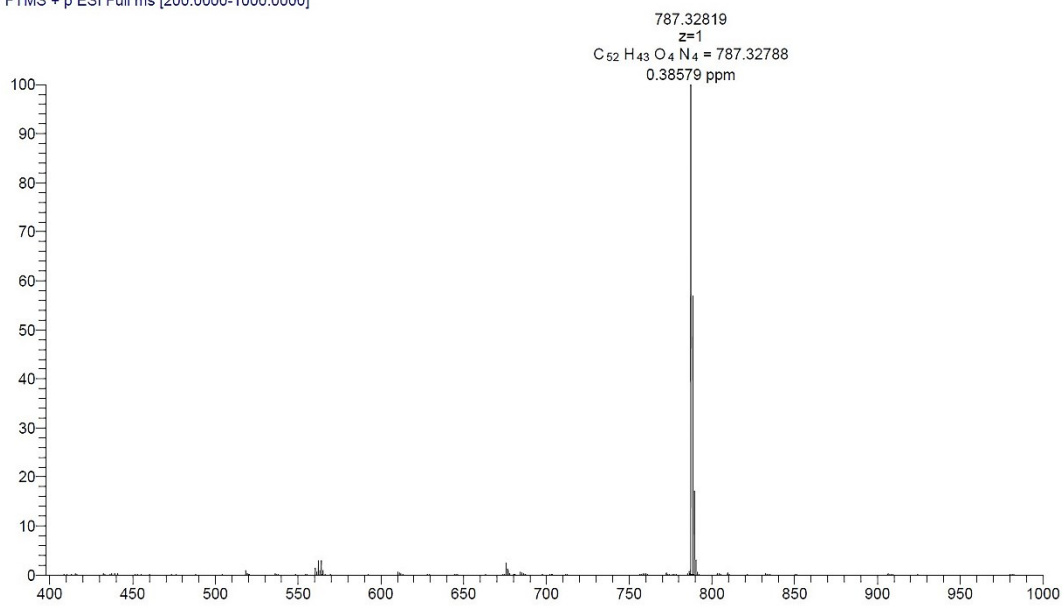

**Fig. S6** HRMS of **M1**.

**Table S1** Detailed calculation of cost for the synthesis of 1 g of M1

| □          | Commercially available chemicals   | Price           | Dosage   | Cost/CNY         |
|------------|------------------------------------|-----------------|----------|------------------|
| Step 1     | 4-bromoaniline                     | 500 g/130 CNY   | 1.36 g   | 0.34             |
|            | <i>p</i> -iodoanisole              | 500 g/826 CNY   | 4.59 g   | 7.48             |
|            | CuI                                | 25 g/35 CNY     | 44.2 mg  | 0.05             |
|            | 1,10-phenanthroline                | 100 g/210 CNY   | 42.5 mg  | 0.09             |
|            | KOH                                | 500 g/18 CNY    | 3.4 g    | 0.12             |
|            | toluene                            | 500 mL/30 CNY   | 68 mL    | 4.08             |
|            | petroleum ether                    | 500 mL/12 CNY   | 850 mL   | 20.40            |
|            | CH <sub>2</sub> Cl <sub>2</sub>    | 500 mL/12 CNY   | 850 mL   | 20.40            |
|            | silica gel                         | 500 g/15 CNY    | 340 g    | 10.20            |
| Step 2     | bis(pinacolato)diboron             | 500 g/900 CNY   | 1.87 g   | 3.37             |
|            | Pd(dppf)Cl <sub>2</sub>            | 10 g/800 CNY    | 170 mg   | 13.60            |
|            | KOAc                               | 500 g/40 CNY    | 1479 mg  | 0.12             |
|            | dioxane                            | 1000 mL/200 CNY | 42.5 mL  | 8.50             |
|            | petroleum ether                    | 500 mL/12 CNY   | 850 mL   | 20.40            |
|            | CH <sub>2</sub> Cl <sub>2</sub>    | 500 mL/12 CNY   | 850 mL   | 20.40            |
|            | silica gel                         | 500 g/15 CNY    | 340 g    | 10.20            |
| Step 3     | 3,8-Dibromo-1,10-phenanthroline    | 25 g/4128 CNY   | 0.6 g    | 99.1             |
|            | Pd(PPh <sub>3</sub> ) <sub>4</sub> | 10 g/530 CNY    | 212.5 mg | 11.22            |
|            | K <sub>2</sub> CO <sub>3</sub>     | 500 g/20 CNY    | 765 mg   | 0.03             |
|            | THF                                | 500 mL/20 CNY   | 57 mL    | 2.27             |
|            | petroleum ether                    | 500 mL/12 CNY   | 700 mL   | 17.04            |
|            | CH <sub>2</sub> Cl <sub>2</sub>    | 500 mL/12 CNY   | 70 mL    | 17.04            |
|            | silica gel                         | 500 g/15 CNY    | 283 g    | 8.52             |
| total cost | □                                  | □               |          | 295<br>(45 US\$) |

**Table S2.** Solubility test of M0 and M1 in chlorobenzene or ethyl acetate at room temperature

| HTM | Chlorobenzene          | Ethyl acetate          |
|-----|------------------------|------------------------|
|     | (mg mL <sup>-1</sup> ) | (mg mL <sup>-1</sup> ) |
| M0  | ~45                    | ~5                     |
| M1  | ~22                    | ~0.9                   |

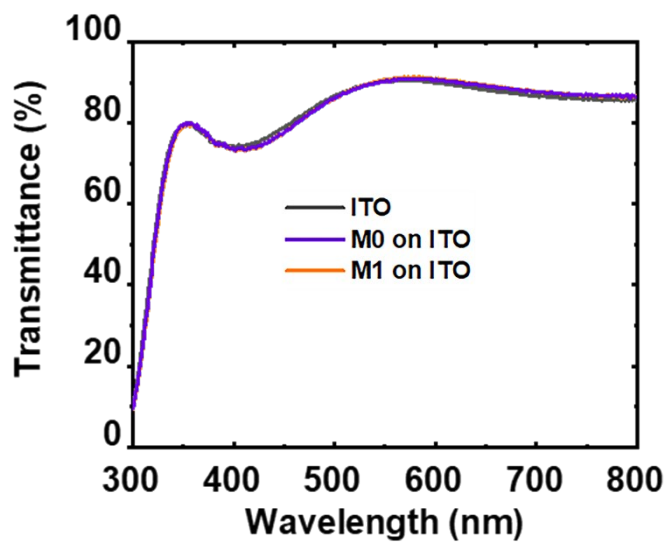

**Fig. S7** Transmittance spectroscopy for the pure ITO (black line), M0 on ITO, and M1 on ITO.

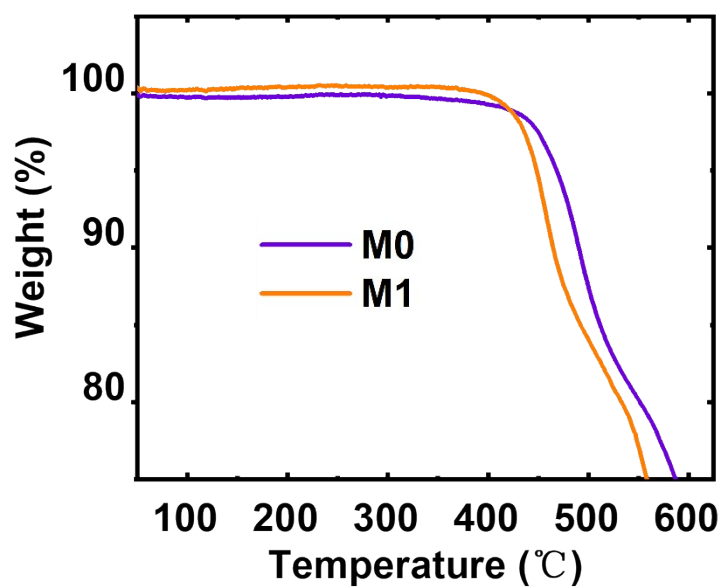

**Fig. S8** TGA curves of M0 and M1 which was measured at a heat ramp of  $10\text{ }^{\circ}\text{C min}^{-1}$

### SCLC Mobility measurement

Hole and electron mobilities were characterized using the space-charge-limited current (SCLC) method. The device structure of ITO/PEDOT:PSS/HTM/Au was used for hole-only devices. The SCLC mobilities were calculated using the MOTT-Gurney equation:

$$J = 9/8 \epsilon_0 \epsilon_r \mu V^2/d^3$$

where  $J$  is the current density,  $\epsilon_r$  is the relative dielectric constant of the active layer, herein, we use a relative dielectric constant of 3 for the polymer.  $\epsilon_0$  is the permittivity of empty space,  $\mu$  is the mobility of hole or electron, and  $d$  is the thickness of the active layer,  $V$  is the internal voltage in the device, and  $V = V_{\text{appl}} - V_{\text{bi}}$ , where  $V_{\text{appl}}$  is the voltage applied to the device, and  $V_{\text{bi}}$  is the built-in voltage resulting from the relative work function difference between the two electrodes (in the hole-only and the electron-only devices, the  $V_{\text{bi}}$  values can be neglected).

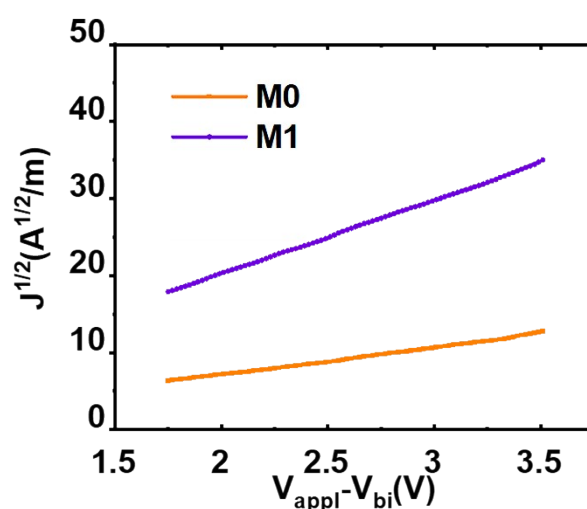

**Fig. S9** The corresponding  $J^{1/2}$ - $V$  curves for the hole-only devices are based on the pure HTM films with a device structure of ITO/PEDOT:PSS/HTM/Au.



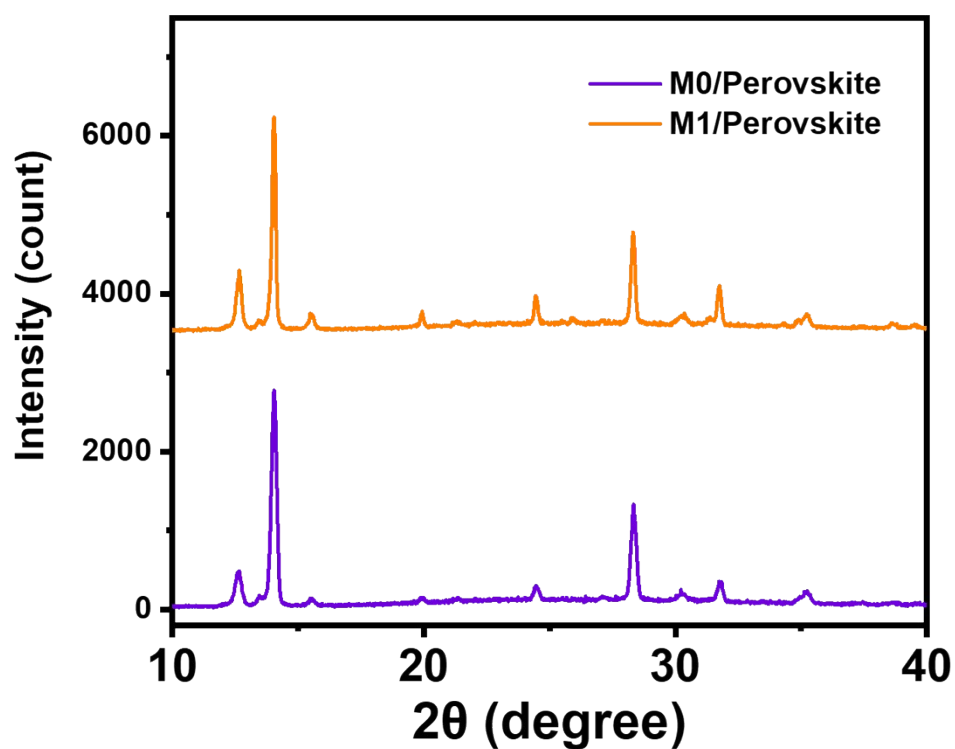

**Fig. S10** XRD patterns of the perovskite films on M0 and M1

**Table S3.** The calculated crystal size from XRD data.

| HTM/perovskite | Crystal size (110) |
|----------------|--------------------|
|                | (nm)               |
| M0/perovskite  | 33.03              |
| M1/perovskite  | 46.58              |

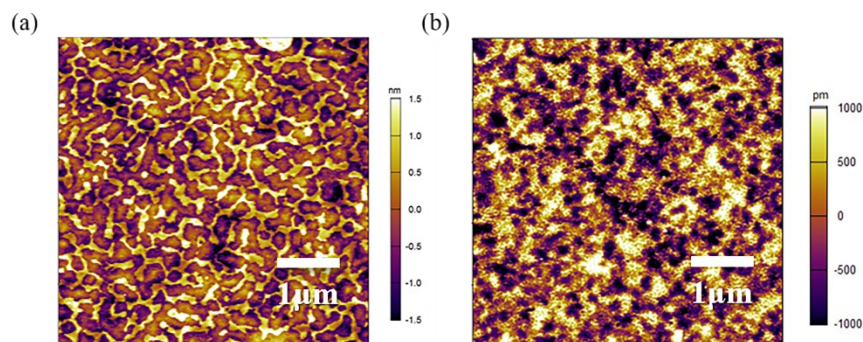

**Fig. S11** Topographic AFM images of the HTM films for (a) M0 and (b) M1 spun from ethyl acetate solution

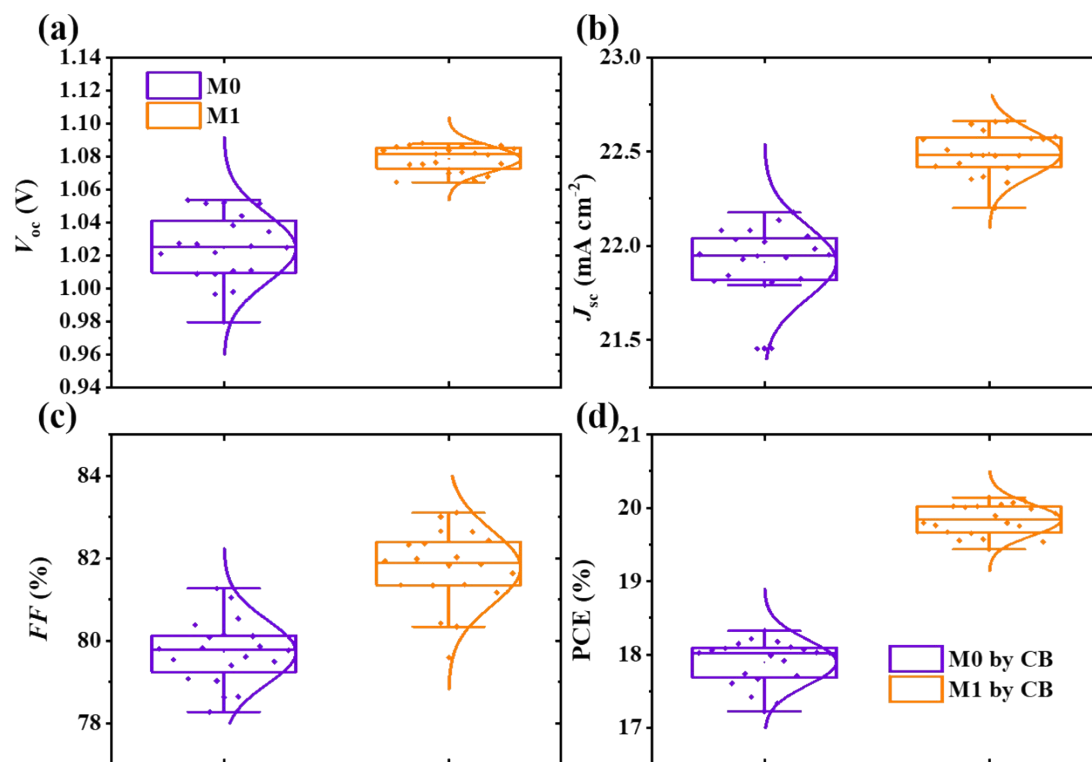

**Fig. S12** (a)–(d) Statistics of photovoltaic parameters for the inverted PVSCs with M0 and M1 HTMs processed by CB. A total of 20 cells for each type of devices were used for statistics

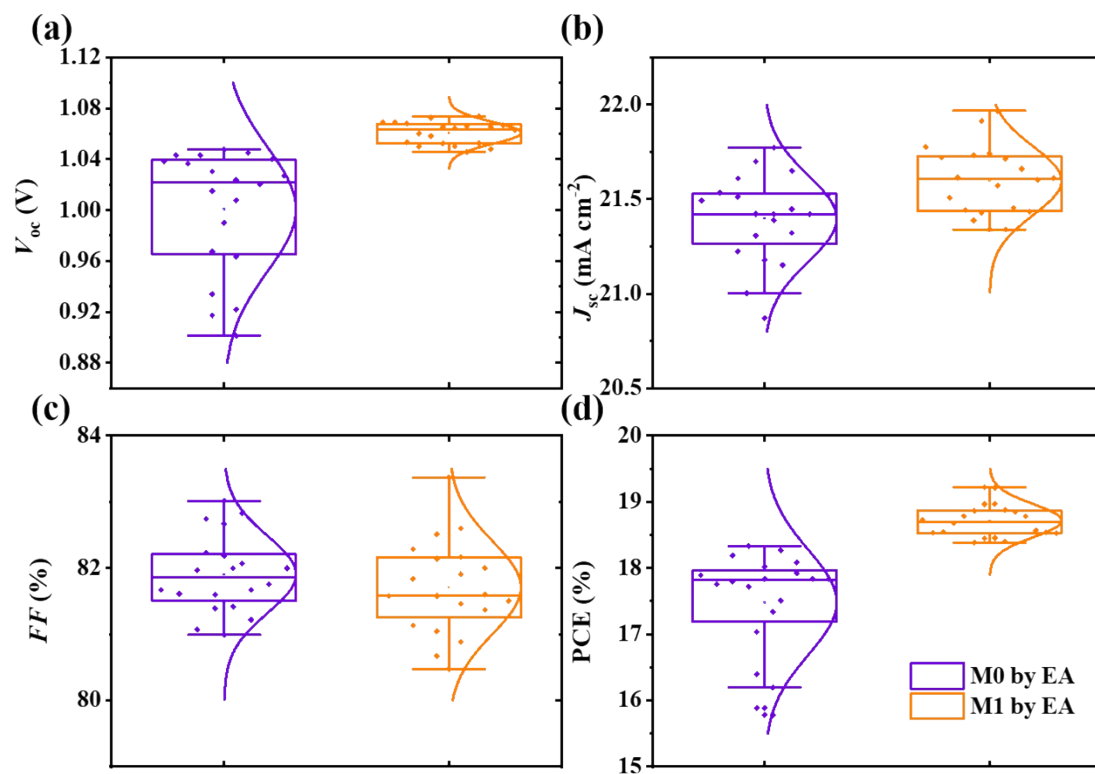

**Fig. S13** (a)–(d) Statistics of photovoltaic parameters for the inverted PVSCs with M0 and M1 HTMs processed by EA. A total of 20 devices were used for statistics.
